# Supplementary material for: Harnessing molecular motors for nanoscale pulldown in live cells
Source: PubMed Central journal article supplement — Mol Biol Cell. 2017 Feb 1;28(3):463–75. doi: 10.1091/mbc.E16-08-0583 (PMC5341729; doi:10.1091/mbc.e16-08-0583), 2017-02-01
Supplement: supp_E16-08-0583v1_E16-08-0583CombinedSupMatsrevised.pdf [file supp_E16-08-0583v1_E16-08-0583CombinedSupMatsrevised.pdf]

# **Supplemental Materials**

*Molecular Biology of the Cell*

Bird and Barzik et al.

## Supplementary Figure 1

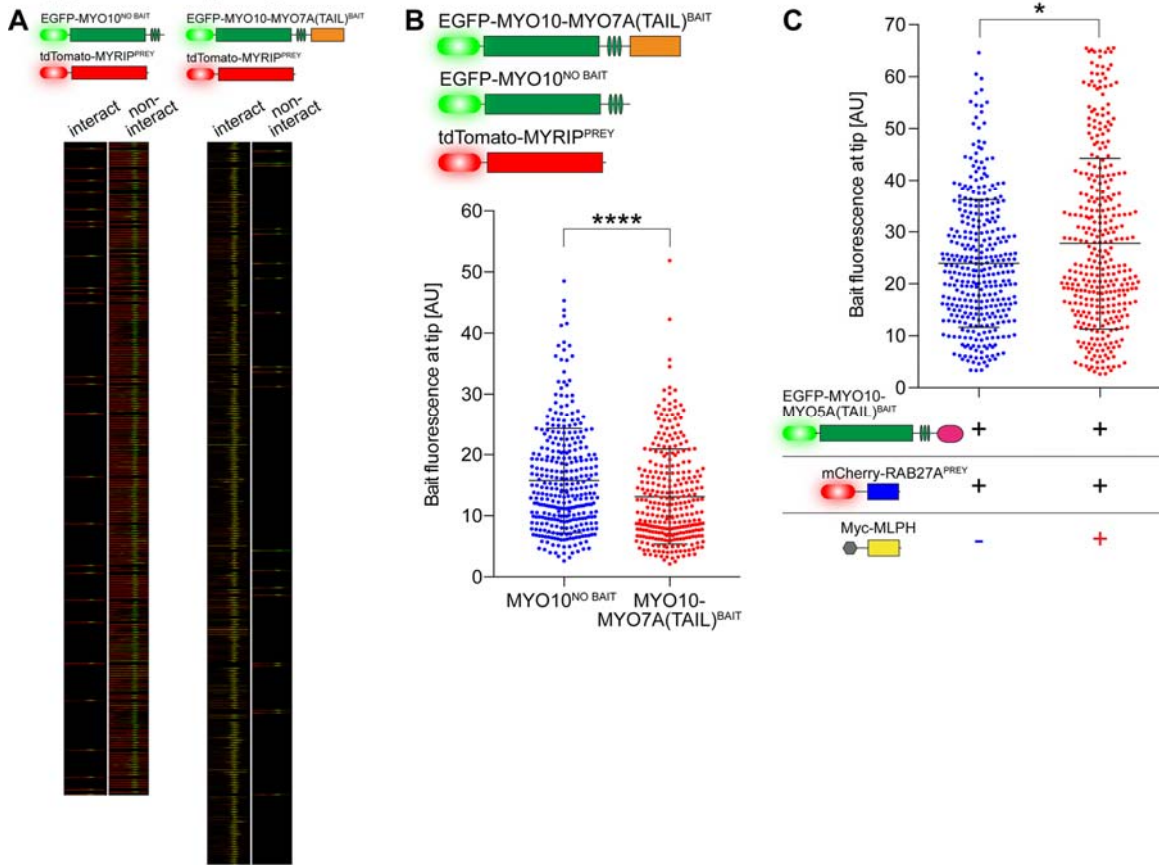

**Figure S1.** Fusion of bait molecules to MYO10 does not interfere with filopodia trafficking.

(A) Graphical summary of spatial correlation analysis from Fig. 3A,C. Bait (green) and prey (red) line scans for each filopodium are remapped along a straight line (aligned to the filopodium tip). Filopodia classified with bait-prey correlation ('Interact') are partitioned to the left column, and to the right ('Non-interact') otherwise. (B) Comparison of bait fluorescence intensities at filopodia tips of Sf9 cells expressing MYO10<sup>NO BAIT</sup> + MYRIP<sup>PREY</sup>, or MYO10-MYO7A(TAIL)<sup>BAIT</sup> + MYRIP<sup>PREY</sup>. Though bait fluorescence is statistically different (Mann-Whitney *U* test), the effect size is minimal indicating the MYO10 motor domain traffics equally, with (red) or without (blue) a bait molecule attached. Data are mean  $\pm$  SD, from 3 independent determinations. (C) Bait intensity of MYO10-MYO5A<sup>BAIT</sup> at Sf9 filopodia tips in the absence (blue) or presence (red) of myc-MLPH. Again, although the bait fluorescence is statistically different (Mann-Whitney *U*-test), the effect size is small, indicating no substantial difference in bait molecule trafficking. Data are mean  $\pm$  SD, from 3 independent determinations. \* =  $P < 0.05$ ; \*\*\*\* =  $P < 0.0001$ .

## Supplementary Figure 2

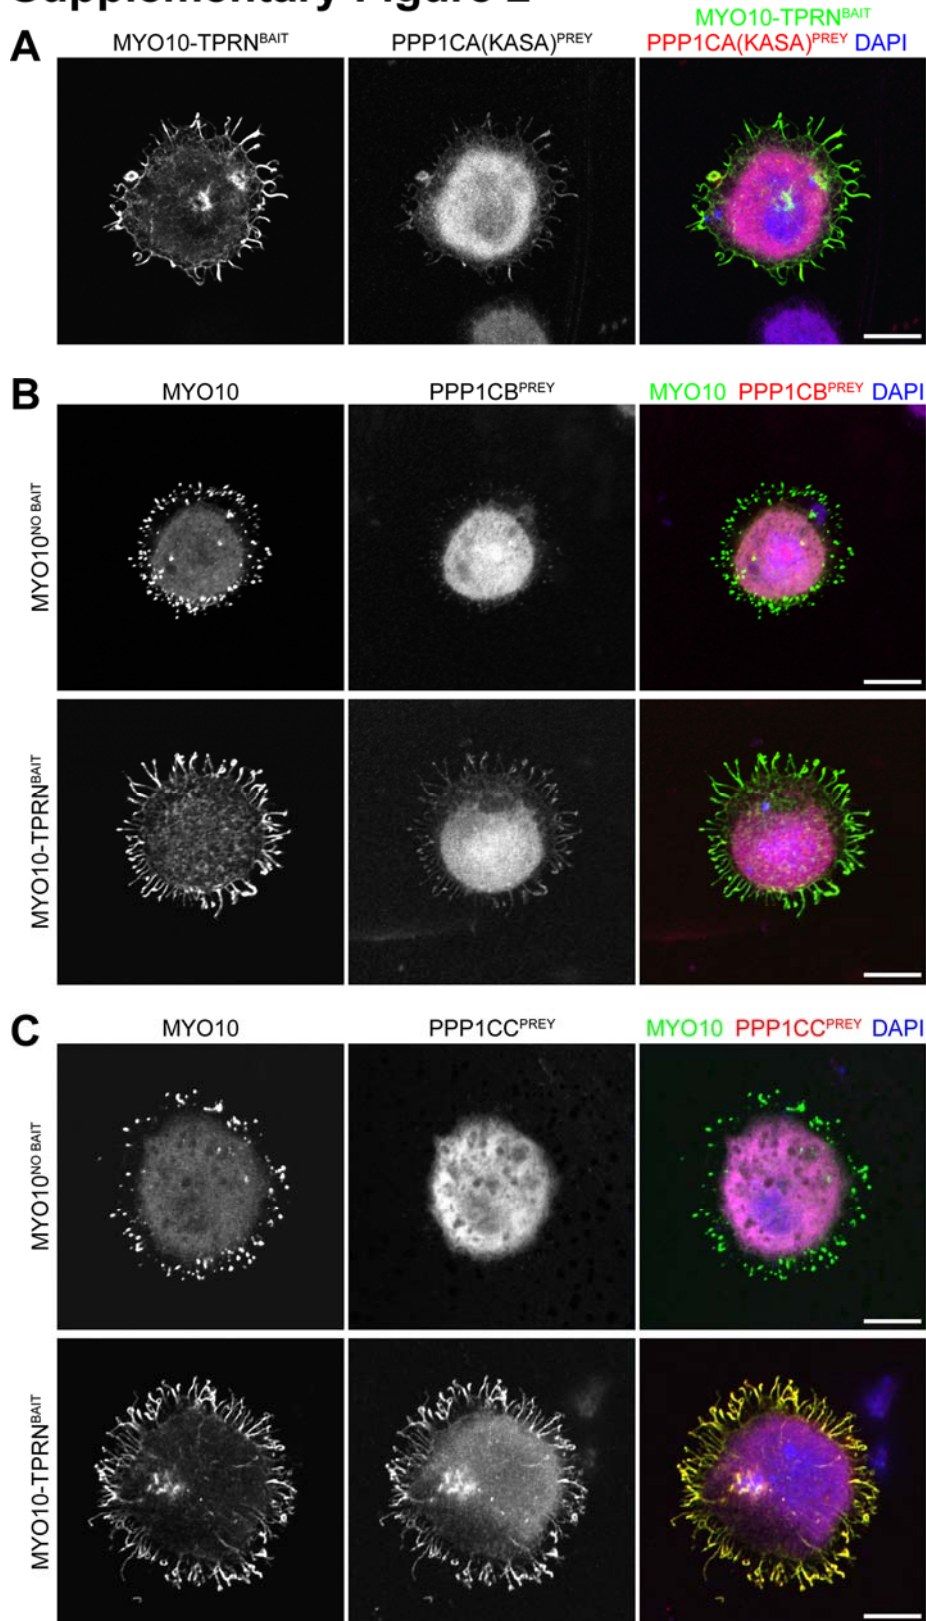

**Figure S2.** Taperin selectively interacts with the catalytic subunits of PP1.  
 (A) Two point mutations in a conserved motif (KISF → KASA) within taperin disrupt its interaction with PPP1CA. (B) PPP1CB does not significantly interact with taperin.  
 (C) Taperin interacts with PPP1CC. All images are from Sf9 cells, with taperin (green), PPP1C isoforms (red) and nuclei labeled with DAPI (blue). Scale bars, 10  $\mu$ m.

### Supplementary Figure 3

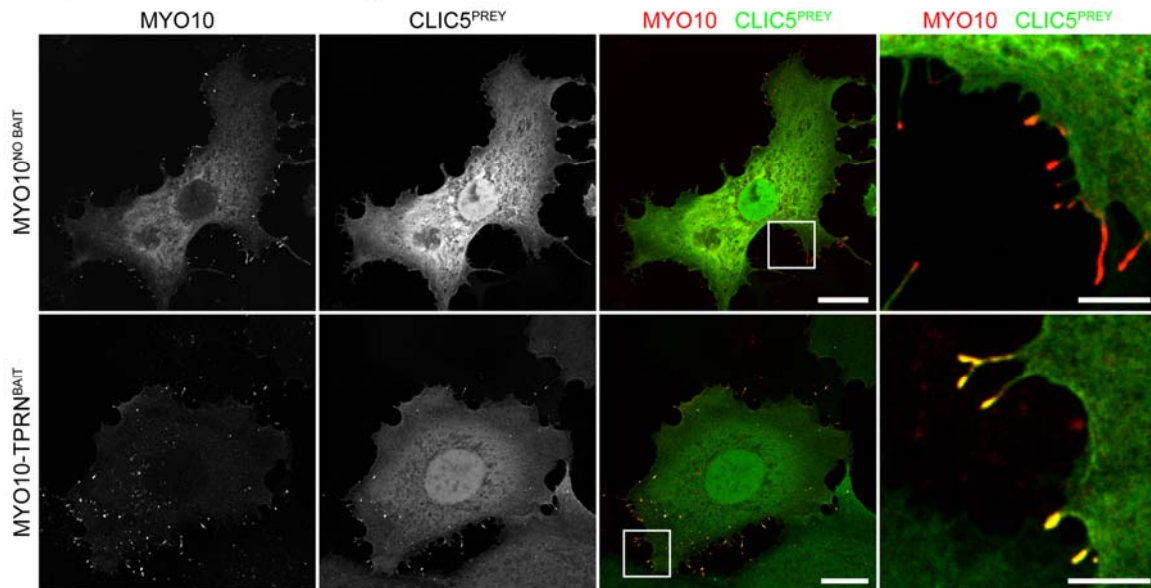

**Figure S3.** Taperin interacts with CLIC5. CLIC5<sup>PREY</sup> (green) was co-expressed with either MYO10<sup>NO BAIT</sup> (control, red, top row) or MYO10-TPRN<sup>BAIT</sup> (query, red, bottom row). Boxed insets are shown magnified (right column). Scale bars, 20  $\mu$ m; 5  $\mu$ m in magnified insets.

**SUPPLEMENTAL MATERIALS**

**Supplemental Table S1. Plasmids used in this study**

| Expression construct                                        | Vector (Source)                          | Accession #                                                             | Encoded amino acids                     |
|-------------------------------------------------------------|------------------------------------------|-------------------------------------------------------------------------|-----------------------------------------|
| <i>Mammalian expression constructs</i>                      |                                          |                                                                         |                                         |
| pEGFP-MYO10                                                 | pEGFP-C2 (Clontech)                      | NP_062345                                                               | 1-2062                                  |
| pEGFP-MYO10-HMM (MYO10 <sup>NO BAIT</sup> )                 | pEGFP-C3 (Clontech)                      | NP_062345                                                               | 1-941                                   |
| pcDNA3.1(+)-MYO10-HMM-Nanotrap (MYO10 <sup>NANOTRAP</sup> ) | pcDNA3.1(+)<br>(ThermoFisher Scientific) | MYO10:<br>NP_062345;<br>Nanotrap:<br>N/A<br>(Rothbauer<br>et al., 2008) | MYO10: 1-<br>941,<br>Nanotrap:<br>1-118 |
| pmCherry-MYO10-HMM (MYO10 <sup>NO BAIT</sup> )              | pmCherry-C1 (Clontech)                   | NP_062345                                                               | 1-941                                   |
| pEGFP-MYO10-MYO7A(TAIL) <sup>BAIT</sup>                     | pEGFP-MYO10-HMM<br>(this study)          | AY821853                                                                | 870-2166                                |
| pmCherry-MYRIP <sup>BAIT</sup>                              | pmCherry-C1 (Clontech)                   | NP_653140                                                               | 1-856                                   |
| pmCherry-MYO10-HMM (MYO10 <sup>NO BAIT</sup> )              | pmCherry-MYO10-HMM<br>(this study)       | NP_062345                                                               | 1-941                                   |
| pEGFP-MYO7A-TAIL (EGFP-MYO7A(TAIL) <sup>BAIT</sup> )        | pEGFP-C2 (Clontech)                      | AY821853                                                                | 870-2166                                |
| pmCherry-MYO10-TPRN <sup>BAIT</sup>                         | pmCherry-MYO10-HMM<br>(this study)       | NP_780495                                                               | 1-749                                   |
| pEGFP-CLIC4 <sup>PREY</sup>                                 | pEGFP-C2 (Clontech)                      | NP_038913                                                               | 1-253                                   |
| pEGFP-CLIC5 <sup>PREY</sup>                                 | pEGFP-C2 (Clontech)                      | NP_766209                                                               | 1-251                                   |
| pEGFP-MYO10-TPRN <sup>BAIT</sup>                            | pEGFP-C3 (Clontech)                      | NP_780495                                                               | 1-749                                   |
| pmCherry-CHD7                                               | pmCherry-C1 (Clontech)                   | NP_060250                                                               | 1-2997                                  |
| <i>Insect expression constructs</i>                         |                                          |                                                                         |                                         |
| pIZ-EGFP                                                    | pIZ/V5-His (Invitrogen)                  |                                                                         |                                         |

|                                                |                                 |              |                                                         |
|------------------------------------------------|---------------------------------|--------------|---------------------------------------------------------|
| pIZ-mCherry                                    | pIZ/V5-His (Invitrogen)         |              |                                                         |
| pIZ-tdTomato                                   | pIZ/V5-His (Invitrogen)         |              |                                                         |
| pIZ-myc                                        | pIZ/V5-His (Invitrogen)         |              |                                                         |
| pIZ-EGFP-MYO10-HMM (MYO10 <sup>NO BAIT</sup> ) | pIZ-EGFP (this study)           | NP_062345    | 1-941                                                   |
| pIZ-EGFP-MYO10-MYO7A(TAIL) <sup>BAIT</sup>     | pIZ-EGFP-MYO10-HMM (this study) | AY821853     | 870-2166                                                |
| pIZ-tdTomato-MYRIP <sup>BAIT</sup>             | pIZ-tdTomato (this study)       | NP_653140    | 1-856                                                   |
| pIZ-EGFP-MYO10-MYO5A(TAIL) <sup>BAIT</sup>     | pIZ-EGFP-MYO10-HMM (this study) | NP_034994    | 931-1853                                                |
| pIZ-mCherry-Rab27a <sup>PREY</sup>             | pIZ/V5-His (Invitrogen)         | NP_001288161 | 1-221                                                   |
| pIZ-myc-MLPH                                   | pIZ-myc (this study)            | NP_443748    | 1-590                                                   |
| pIZ-EGFP-MYO10-TPRN <sup>BAIT</sup>            | pIZ-EGFP-MYO10-HMM (this study) | NP_780495    | 1-749                                                   |
| pIZ-EGFP-MYO10-TPRN(KASA) <sup>BAIT</sup>      | pIZ-EGFP-MYO10-HMM (this study) | NP_780495    | 1-749, with the following point mutations: I625A, F627A |
| pIZ-mCherry-PPP1CA <sup>PREY</sup>             | pIZ-mCherry (this study)        | NP_114074    | 1-330                                                   |
| pIZ-mCherry-PPP1CB <sup>PREY</sup>             | pIZ-mCherry (this study)        | NP_766295    | 1-327                                                   |
| pIZ-mCherry-PPP1CC <sup>PREY</sup>             | pIZ-mCherry (this study)        | NP_038664    | 1-323                                                   |
| pIZ-mCherry-CHD4(561-936) <sup>PREY</sup>      | pIZ-mCherry (this study)        | NP_666091    | 561-936                                                 |
| pIZ-mCherry-CHD4(DEXDc) <sup>PREY</sup>        | pIZ-mCherry (this study)        | NP_666091    | 715-906                                                 |
| pIZ-EGFP-MYO10-TPRN(1-260) <sup>BAIT</sup>     | pIZ-EGFP-MYO10-HMM (this study) | NP_780495    | 1-260                                                   |
| pIZ-EGFP-MYO10-TPRN(261-622) <sup>BAIT</sup>   | pIZ-EGFP-MYO10-HMM (this study) | NP_780495    | 261-622                                                 |
| pIZ-EGFP-MYO10-TPRN(623-749) <sup>BAIT</sup>   | pIZ-EGFP-MYO10-HMM (this study) | NP_780495    | 623-749                                                 |

|                                         |                          |                  |          |
|-----------------------------------------|--------------------------|------------------|----------|
| pIZ-mCherry-CHD1(DEXDc) <sup>PREY</sup> | pIZ-mCherry (this study) | NP_031716        | 475-672  |
| pIZ-mCherry-CHD2(DEXDc) <sup>PREY</sup> | pIZ-mCherry (this study) | NP_0010748<br>14 | 480-677  |
| pIZ-mCherry-CHD3(DEXDc) <sup>PREY</sup> | pIZ-mCherry (this study) | NP_666131        | 735-1001 |
| pIZ-mCherry-CHD7(DEXDc) <sup>PREY</sup> | pIZ-mCherry (this study) | NP_0012640<br>78 | 955-1155 |

**Table S2. Yeast 2-hybrid interactions identified with taperin  
Results from mouse inner ear Y2H screen**

| Gene name                                                                         | # of clones | Confirmed by NanoSPD? |
|-----------------------------------------------------------------------------------|-------------|-----------------------|
| Chromodomain helicase DNA binding protein 4 ( <i>Chd4</i> )                       | 16          | <b>Yes</b>            |
| Protein phosphatase 1 catalytic subunit alpha ( <i>Ppp1ca</i> )                   | 5           | <b>Yes</b>            |
| Chromodomain helicase DNA binding protein 3 ( <i>Chd3</i> )                       | 3           | <b>Yes</b>            |
| Chloride intracellular channel 4 ( <i>Clic4</i> )                                 | 1           | <b>Yes</b>            |
| Hes related family bHLH transcription factor with YRPW motif-like ( <i>Heyl</i> ) | 3           | Not tested            |
| Chloride intracellular channel 1 ( <i>Clic1</i> )                                 | 2           | Not tested            |
| Fatty acid synthase ( <i>Fasn</i> )                                               | 2           | Not tested            |
| Protein disulfide isomerase family A member 4 ( <i>Pdia4</i> )                    | 2           | Not tested            |
| Germ cell-less spermatogenesis associated 1 ( <i>Gmcl1</i> )                      | 1           | Not tested            |
| Lysine acetyltransferase 5 ( <i>Kat5</i> )                                        | 1           | Not tested            |
| Actin binding LIM protein 1 ( <i>Ablim1</i> )                                     | 1           | Not tested            |
| Zinc finger and BTB domain containing 44 ( <i>Zbtb44</i> )                        | 1           | Not tested            |



**Table S2 Continued.**  
**Results from mouse kidney Y2H screen**

| Gene name                                                                         | # of clones | Confirmed by NanoSPD? |
|-----------------------------------------------------------------------------------|-------------|-----------------------|
| Protein phosphatase 1 catalytic subunit alpha ( <i>Ppp1ca</i> )                   | 11          | <b>Yes</b>            |
| Chromodomain helicase DNA binding protein 4 ( <i>Chd4</i> )                       | 5           | <b>Yes</b>            |
| Protein phosphatase 1 catalytic subunit gamma ( <i>Ppp1cc</i> )                   | 3           | <b>Yes</b>            |
| Chromodomain helicase DNA binding protein 3 ( <i>Chd3</i> )                       | 2           | <b>Yes</b>            |
| Chloride intracellular channel 5 ( <i>Clic5</i> )                                 | 2           | <b>Yes</b>            |
| Villin-like ( <i>Vill</i> )                                                       | 6           | Not tested            |
| Chloride intracellular channel 1 ( <i>Clic1</i> )                                 | 2           | Not tested            |
| Germ cell-less spermatogenesis associated 1 ( <i>Gmcl1</i> )                      | 2           | Not tested            |
| Epidermal growth factor receptor pathway substrate 8 ( <i>Eps8</i> )              | 2           | Not tested            |
| Hes related family bHLH transcription factor with YRPW motif-like ( <i>Heyl</i> ) | 1           | Not tested            |
| Xeroderma pigmentosum, complementation group C ( <i>Xpc</i> )                     | 1           | Not tested            |
| Family with sequence similarity 107, member B, ( <i>Fam107b</i> )                 | 1           | Not tested            |
